# Supplementary material for: Uhrf1 regulates active transcriptional marks at bivalent domains in pluripotent stem cells through Setd1a
Source: PubMed Central journal article supplement (PMC6030064; doi:10.1038/s41467-018-04818-0), 2018-07-03
Supplement: 41467_2018_4818_MOESM1_ESM.pdf [file 41467_2018_4818_MOESM1_ESM.pdf]

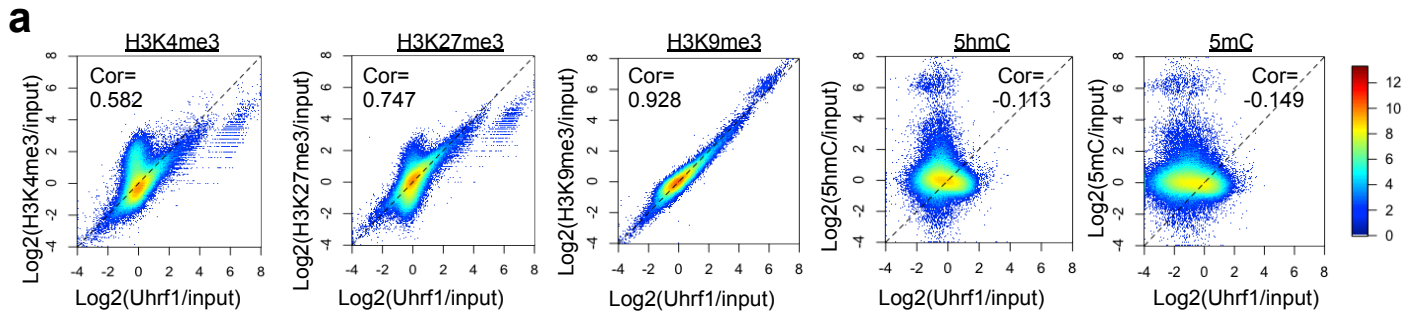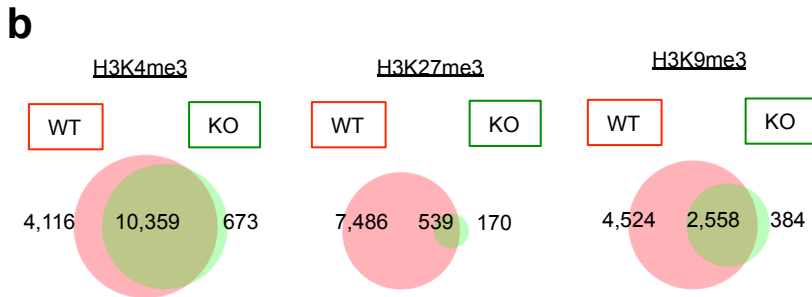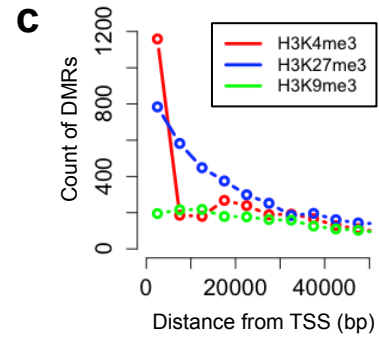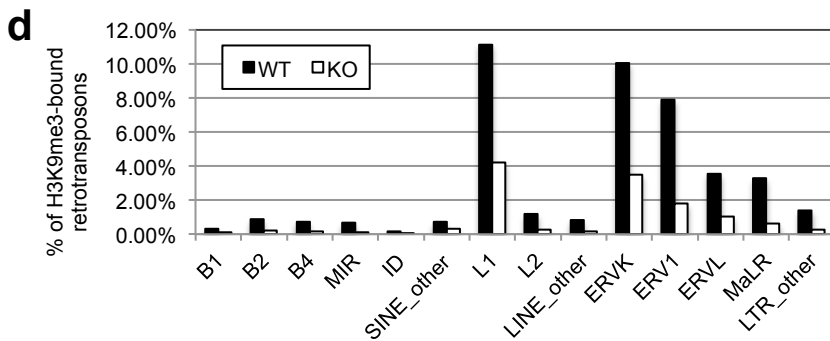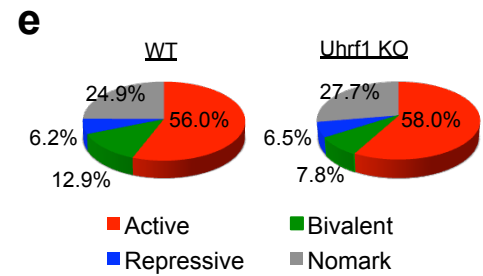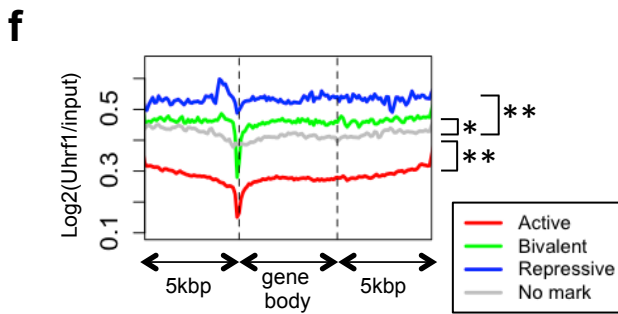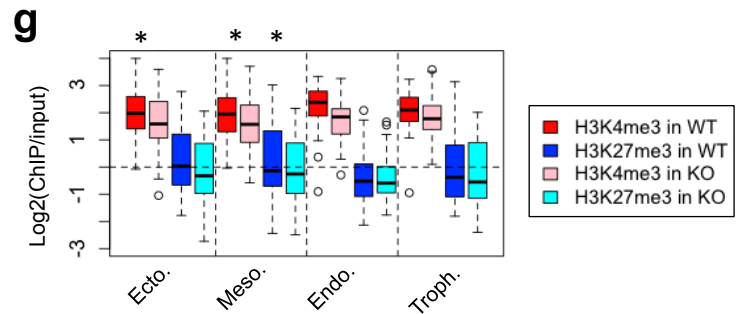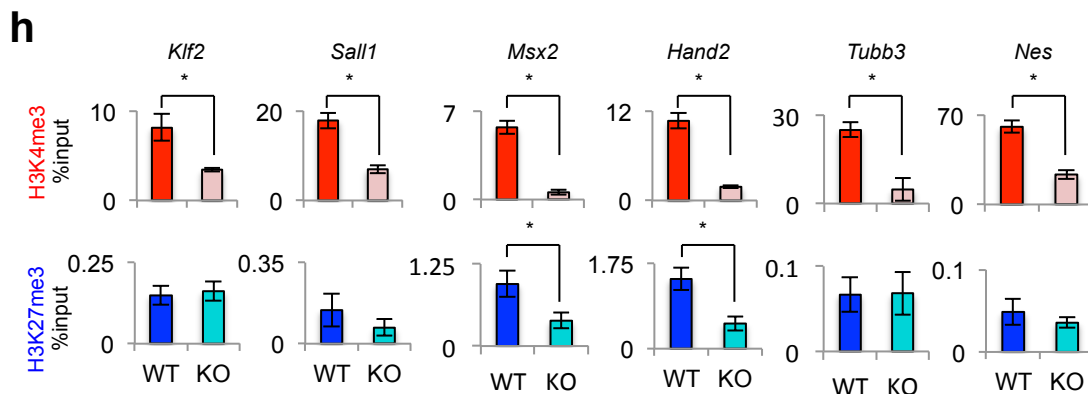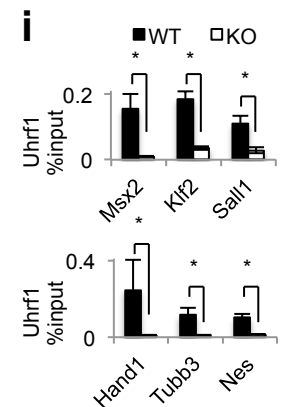

**Supplementary Figure 1. Uhrf1 is strongly associated with histone modifications**

**(a)** Comparison of genome-wide distribution of Uhrf1 against histone modifications, 5hmC and 5mC. Log<sub>2</sub> (ChIP/input) was calculated in 10k-bp bins throughout the mouse genome. Z-axis represents log<sub>2</sub> (count+1). Pearson correlation coefficients are shown.

**(b)** Overlap of histone modification peaks between WT and Uhrf1 KO ESCs

**(c)** Distance of differential histone modification peaks from nearest TSSs.

**(d)** Percentage of H3K9me<sub>3</sub>-enriched retrotransposons in WT and Uhrf1 KO ESCs

**(e)** Frequency of promoter classes between WT and Uhrf1 KO ESCs.

**(f)** Distribution of Uhrf1 binding in active, bivalent, repressive and no mark genes. Enrichment of Uhrf1 on gene body was evaluated by two-side Student's *t*-test (\*  $p < 0.05$  and \*\*  $p < 0.005$ ).

**(g)** Comparison of histone modification levels in promoter regions of WT and Uhrf1 KO ESCs. Red and pink boxes represent log<sub>2</sub> (H3K4me<sub>3</sub> ChIP/input) in WT and Uhrf1 KO ESCs, respectively. Blue and cyan boxes represent log<sub>2</sub> (H3K27me<sub>3</sub> ChIP/input) in WT and Uhrf1 KO ESCs, respectively. \*  $p < 0.05$  by one-side Student's *t*-test

**(h-i)** ChIP-qPCR for (h) H3K4me<sub>3</sub>, H3K27me<sub>3</sub> and (i) Uhrf1 in pluripotent, mesodermal and neuroectodermal gene loci. \*  $p < 0.05$  by two-side paired Student's *t*-test.

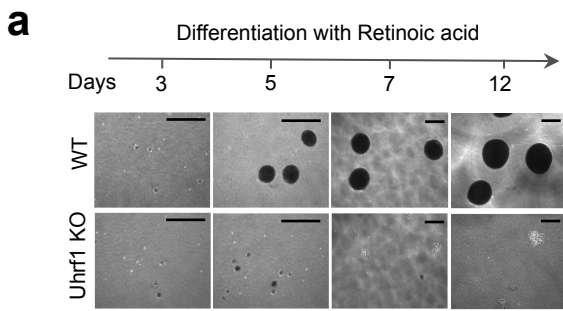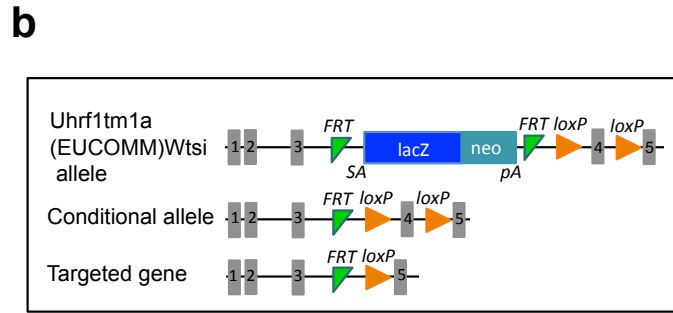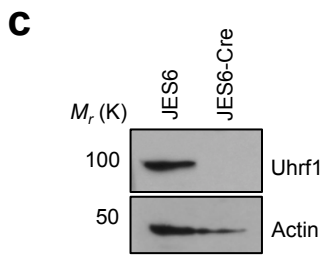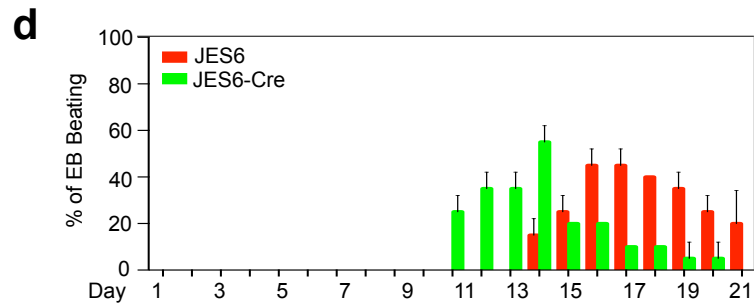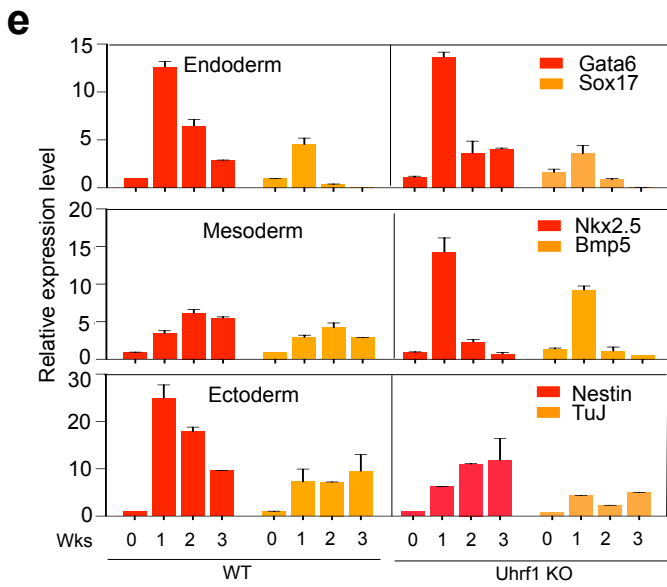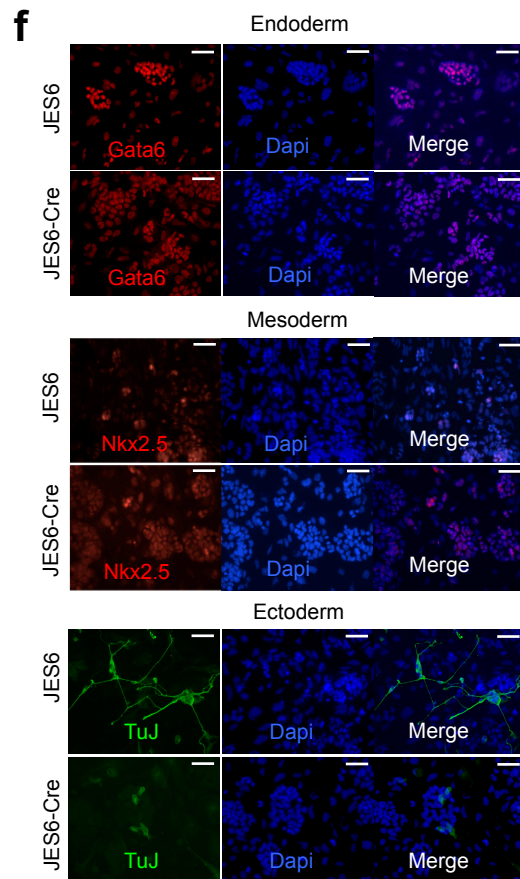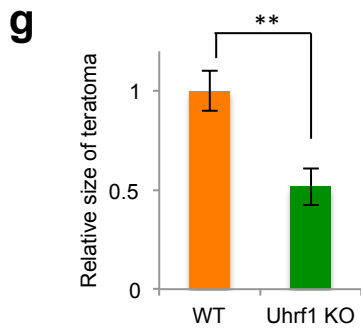

**Supplementary Figure 2. Defects in differentiation potential in Uhrf1 KO mESCs.**

- (a) WT and KO cells were differentiated to EBs in the presence of neural lineage specific differentiation medium supplemented with retinoic acid. The scale bar represents 4 mm.
- (b) The structure of the *Uhrf1* <sup>tm1a</sup>(EUCOMM) *Wtsi* allele. Excising the FRT with Flippase created a conditional allele. Expression of Cre recombinase excised exon 4 of *Uhrf1*.
- (c) Western blotting analysis of *Uhrf1* in JES6-Cre mESC line.
- (d) JES6 and JES6-Cre mESCs were differentiated to EBs, and analyzed daily under the microscope for the presence of a rhythmic beating until day 21. Data represent the mean  $\pm$  SD of three independent experiments.
- (e) qPCR analysis of lineage specific and pluripotency markers upon *in vitro* differentiation. Three independent experiments were carried out and values were normalized to  $\beta$ -actin. The error bars represent the standard deviation.
- (f) Representative Immunostaining of differentiated JES6 and JES6-Cre ESC lines. One week post differentiation, EBs was dissociated and plated onto gelatin-coated plates. Immunostaining with lineage specific markers was performed 2 days after plating. The scale bar represents 4 mm.
- (g) Quantification of teratoma diameter generated from WT or *Uhrf1* KO ESCs. Data represent the mean  $\pm$  SD of six independent experiments. \*\*  $p < 0.01$  by unpaired, two-tailed Student's *t*-test analysis.

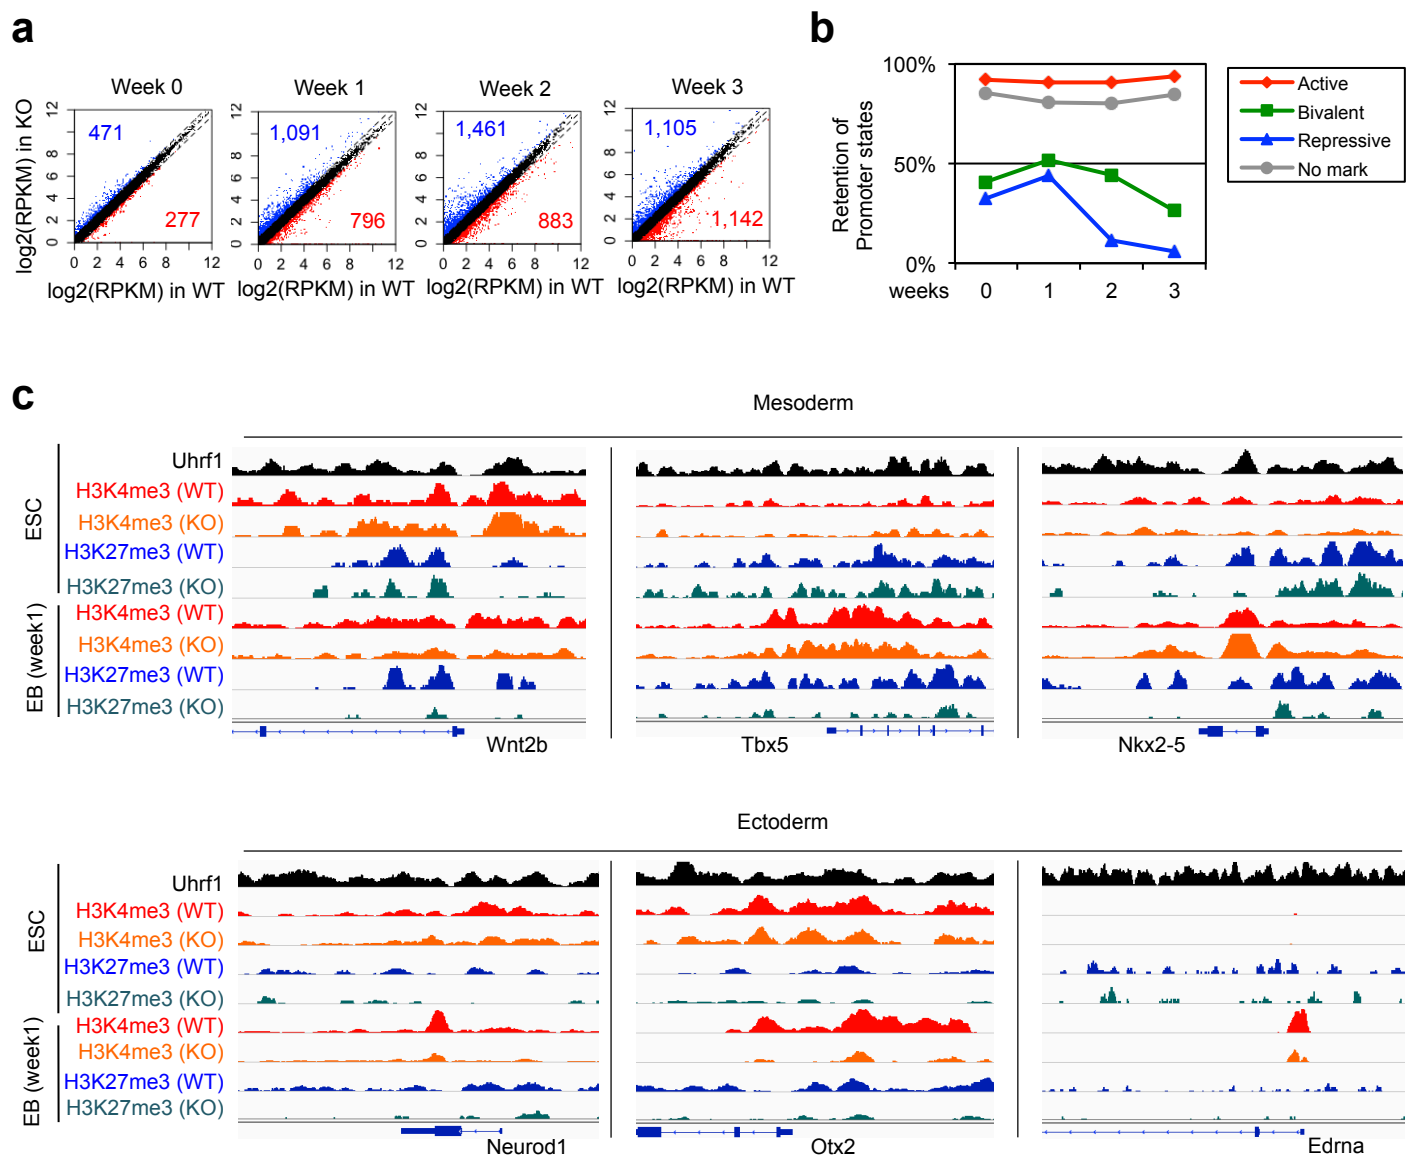

**Supplementary Figure 3. Disruption of histone modifications in Uhrf1 KO mESCs.**

**(a)** Comparison of gene expression profiles between WT and Uhrf1 KO ESCs at each time point. Red and blue dots represent differentially expressed genes (>1.5 fold) in WT and KO, respectively. The count represents the number of differentially expressed genes.

**(b)** Percentage of promoter states retained in Uhrf1 KO at each time point.

**(c)** Histone modification landscape of representative genes related to mesodermal, endodermal, and neuroectodermal development in ESCs and week 1 EBs.

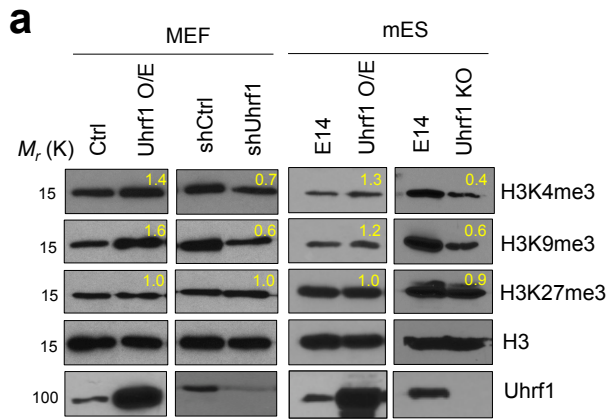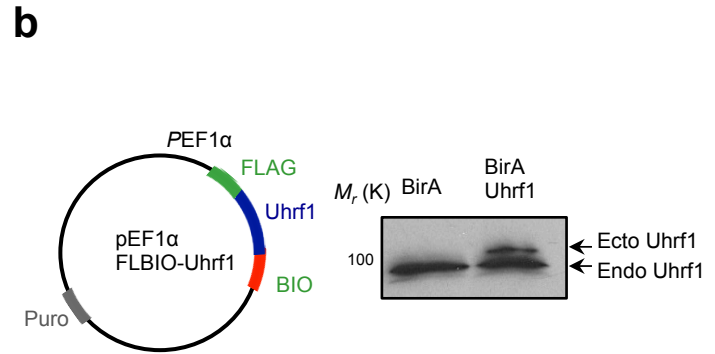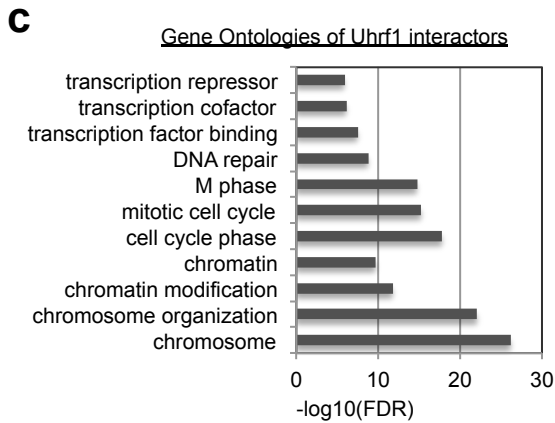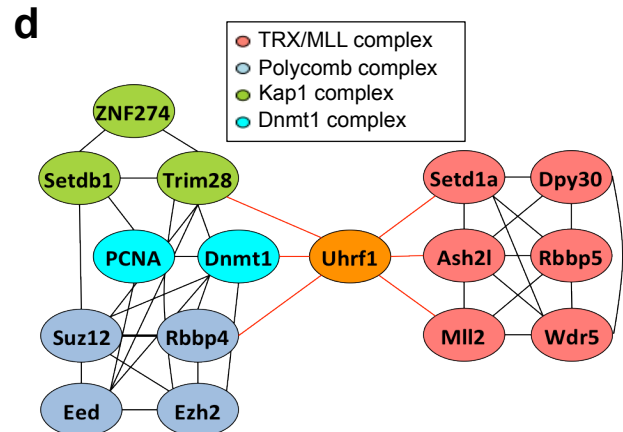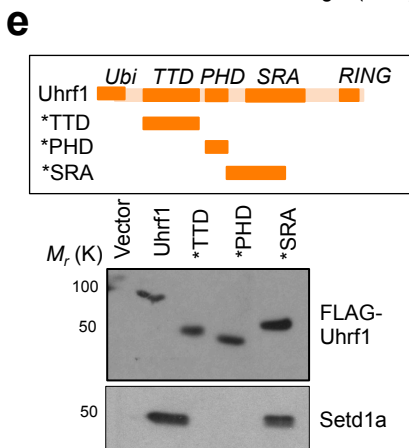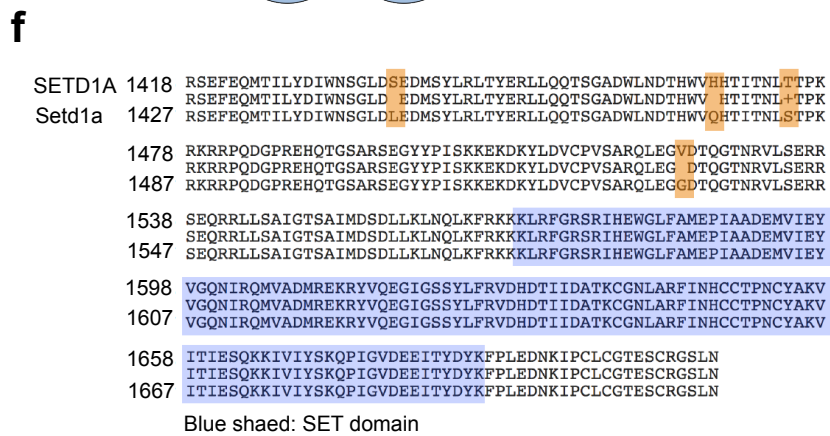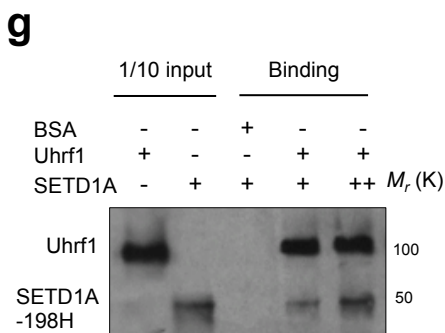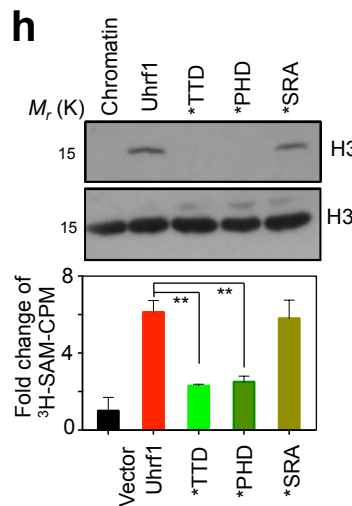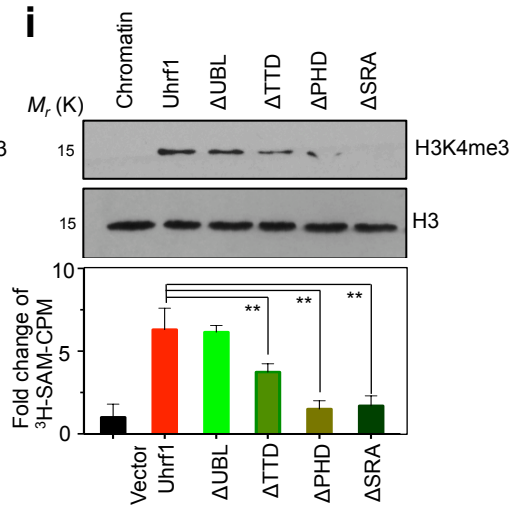

**Supplementary Figure 4. The SRA of Uhrf1 mediates the direct interaction with Setd1a.**

**(a)** Western blotting analysis of H3K4me3, H3K27me3 and H3K9me3. Overexpression and knock down of Uhrf1 in MEFs and mESCs were analyzed (Experimental replicates, n=3). Quantification of band intensity was analyzed using Image J software, and relative expression of Uhrf1 compared with control O/E, control shRNA or WT ESC is shown with mean +/- S.D. \* p<0.05 by unpaired, two-tailed Student's *t*-test analysis.

**(b)** Establishment of mESC lines stably expressing Uhrf1 with FLAG tag. Full length Uhrf1 was subcloned into a pEF1alphaFLAGBio (FLBIO)-puro vector using SmaI and EcoRV. Western blot analysis using Uhrf1 antibody confirmed the expression of sub-endogenous level of ectopic Uhrf1.

**(c)** Over represented GO term of Uhrf1 interaction partners

**(d)** Network analysis of Uhrf1 histone modification complexes. Red edges are interactions detected in this study. Black edges are interactions in BioGRID database (version 3.4.125).

**(e)** Each domain of Uhrf1 (\*TTD, \*PHD and \*SRA) was expressed in HEK293T cells and used for co-immunoprecipitation with Setd1a. The SRA domain is sufficient to interact with Setd1a.

**(f)** Alignment of human SETD1A-198H (amino acid 1418 – end) and murine Setd1a (amino acid 1427 – end). The blue shaded amino acids represent SET domain, which are identical in both mouse and human. Orange box represents the different amino acid.

**(g)** Uhrf1 directly interacts with SETD1A. Purified recombinant Uhrf1 and recombinant partial SETD1A protein SETD1A-198H (amino acid 1418 – end) that has n-SET and SET domain (f), were used in an *in vitro* binding assay. For input, 1/10 of proteins used for binding assay were loaded. For binding, + represents adding of 0.15 mg, and ++ represents 0.3 mg. After pulling down recombinant Uhrf1 with an Uhrf1 antibody, a GST antibody was used for Western analysis to detect Uhrf1 and SETD1A-198H.

**(h)** *In vitro* HMT assay performed with protein complexes, which had been immunoprecipitated with each of the Uhrf1 domain shown in (c). The complex from SRA domain of Uhrf1 was sufficient for H3K4me3 modification of chromatin substrate.

**(i)** The TTD and PHD domain in addition to the SRA domain of Uhrf1 are essential for full methylation activity towards chromatin as a substrate.

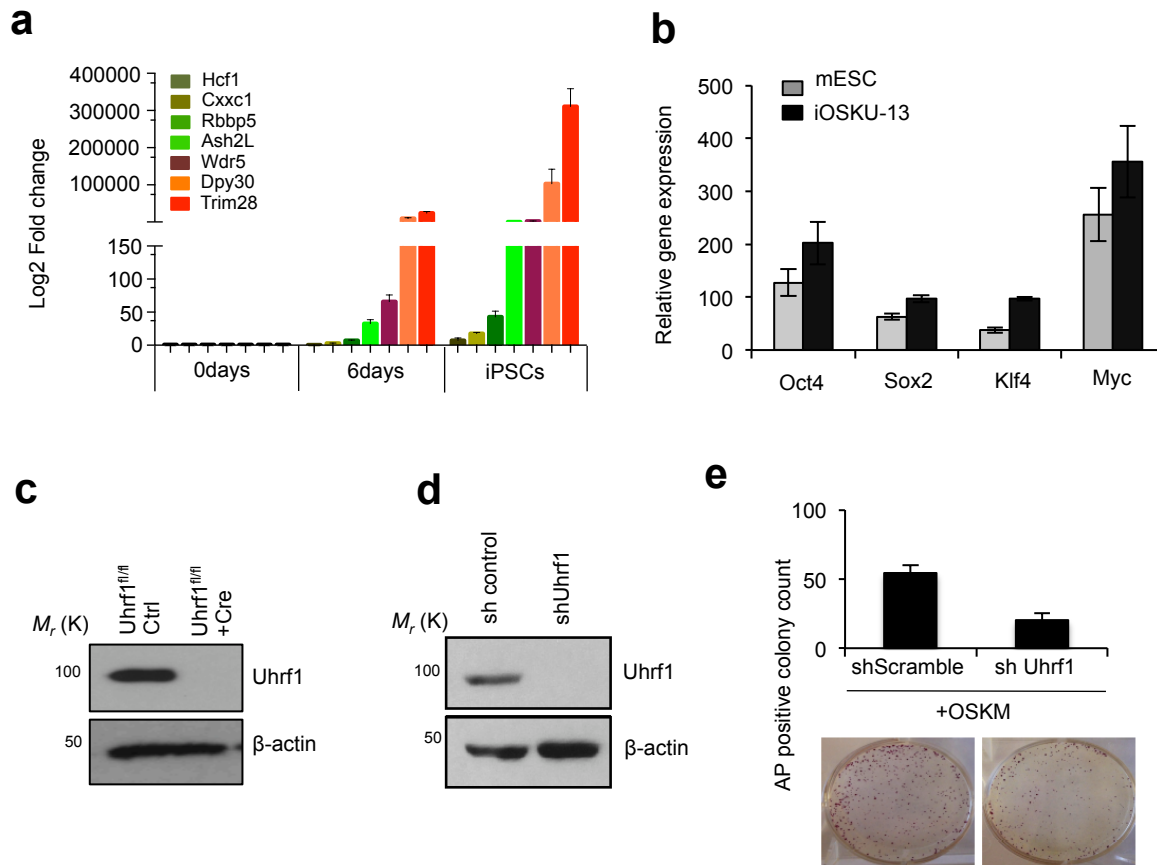

### Supplementary Figure 5. Uhrf1 is essential for reprogramming.

(a) Expression of Setd1a/COMPASS complex proteins during reprogramming. Data are expressed relative to Day 0 MEF values. The data is from  $n = 3$  experimental replicates.

(b) Expression of endogenous pluripotent genes (*Oct4*, *Sox2*, *Klf4*, and *Myc*) in iPSC line derived from MEFs by expression of Oct4, Sox2, Klf4 and Uhrf1 (iOSKU-13) compared with those in J1 mESC line.

(c) Deletion of Uhrf1 in Uhrf1<sup>fl/fl</sup>-MEFs by expression of Cre recombinase validated by Western analysis.

(d) Depletion of Uhrf1 using shRNA in MEFs was confirmed using Western analysis.

(e) Quantification of Alkaline Phosphatase positive colonies on reprogramming day 13 after expressing four reprogramming factors (Oct4, Sox2, Klf4 and Myc, OSKM) in MEFs infected with lentivirus expressing scramble or Uhrf1 shRNAs.



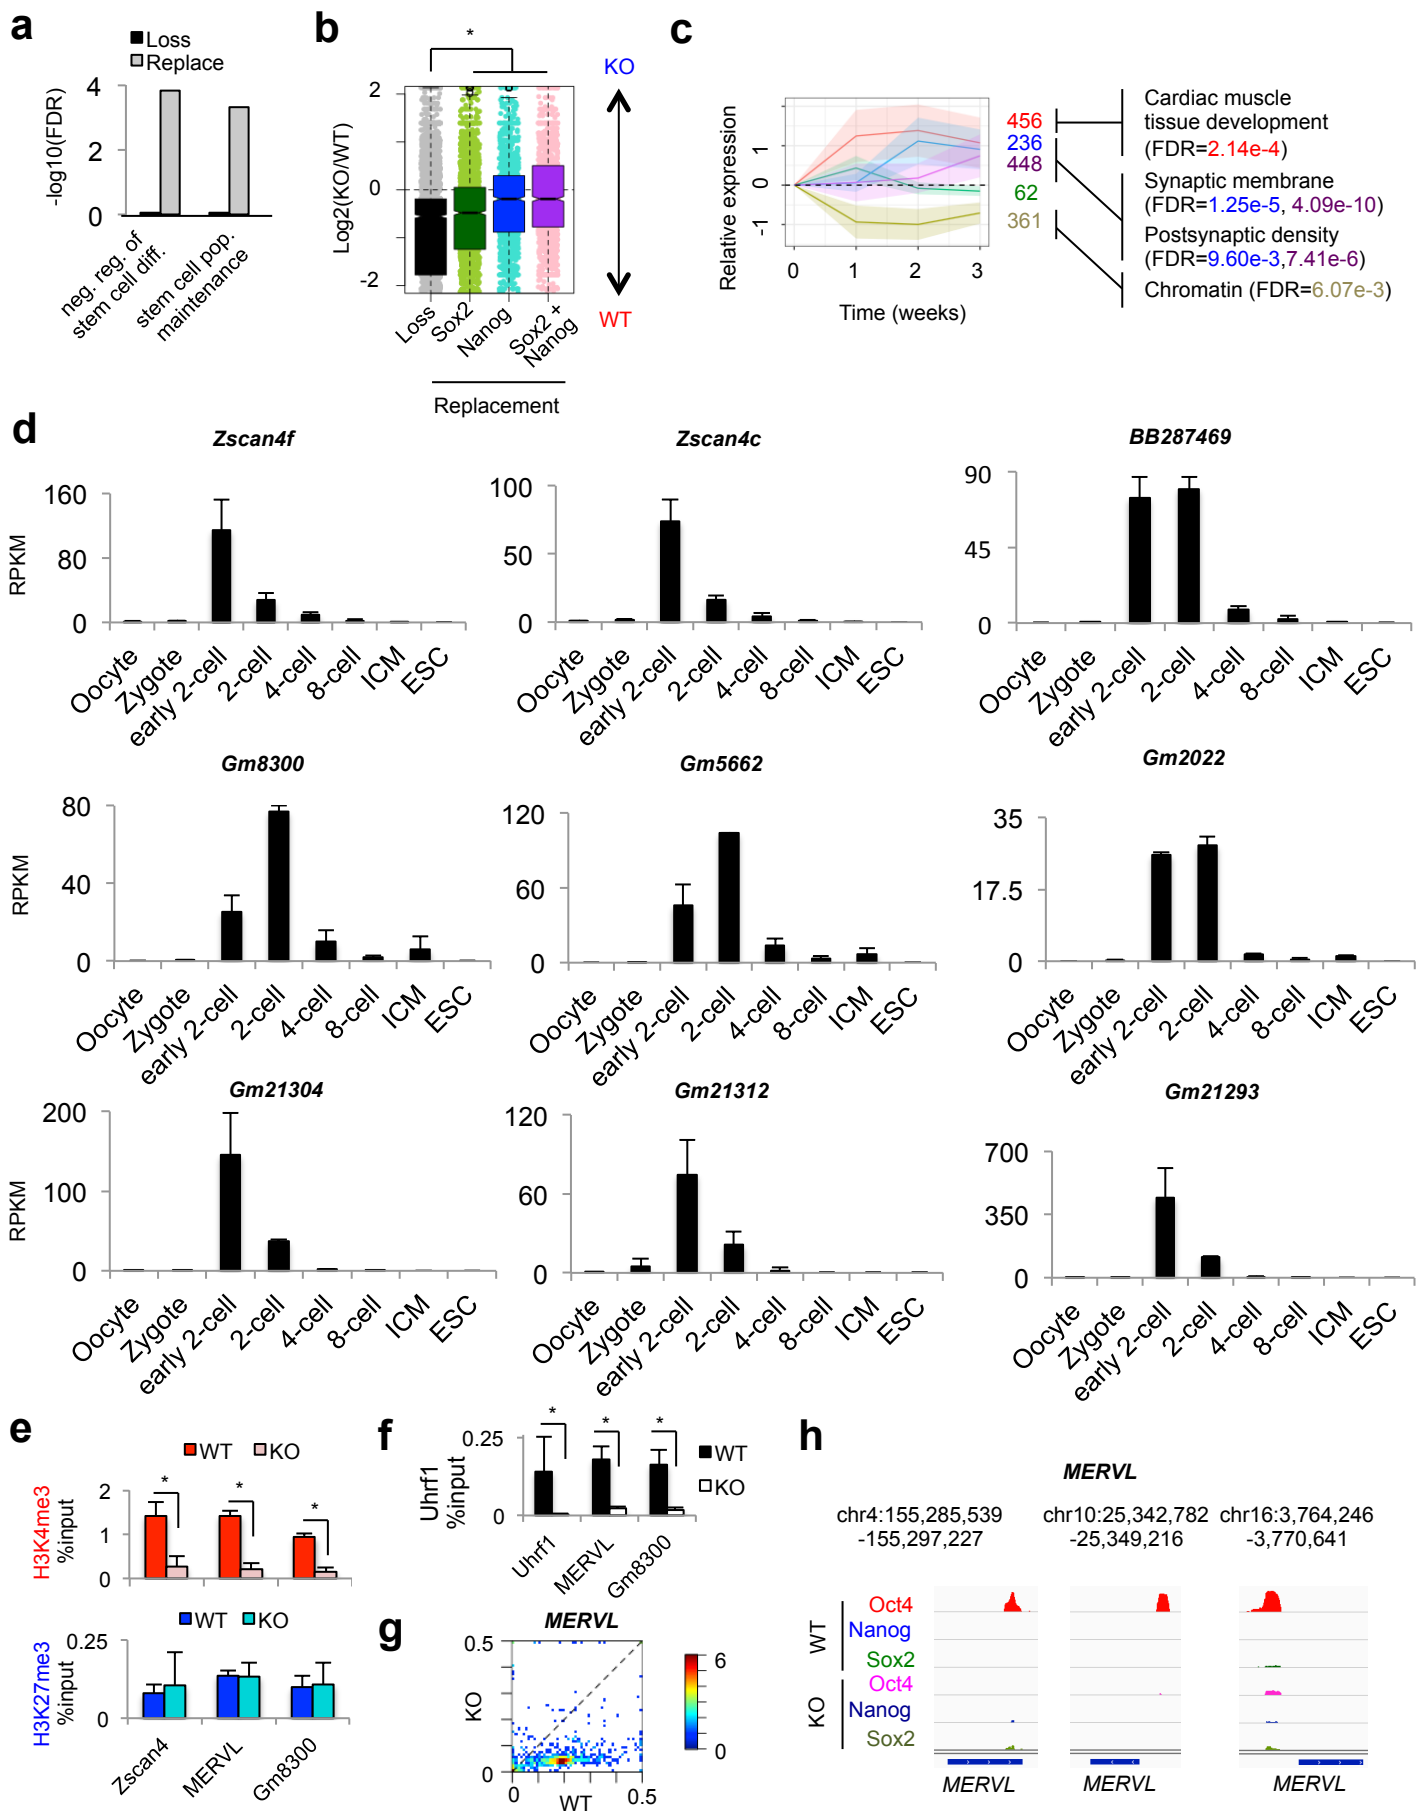

**Supplementary Figure 6. Uhrf1 regulates 2C-related genes.**

- (a) Functions of genes that show a loss or replacement in Oct4 binding upon Uhrf1 KO are related with stem cell maintenance.  $-\log_{10}$  (FDR) for GO terms, GO:2000737 (negative regulation of stem cell differentiation) and GO:0019827 (stem cell population maintenance), is shown.
- (b) Comparison of chromatin accessibility between WT and KO in loss or replacement of Oct4 binding sites. \*  $p < 0.05$  by two-side Student's *t*-test.
- (c) Gene expression patterns of target genes where loss of Oct4 binding has occurred. Target genes were clustered by Pearson correlation coefficient. The number of genes and representative GO terms in each cluster were also shown in the right panel.
- (d) 2C stage-specific gene expression of top down-regulated genes in Uhrf1 KO ESCs.
- (e-f) ChIP-qPCR for (e) H3K4me3, and H3K27me3, or (f) Uhrf1 on 2C-gene loci. \*  $p < 0.05$  by two-side Student's *t*-test .
- (g) Comparison of MERVL retrotransposon expression between WT and Uhrf1 KO ESCs.
- (h) Binding landscape of core pluripotent factors around *MERVLs*.

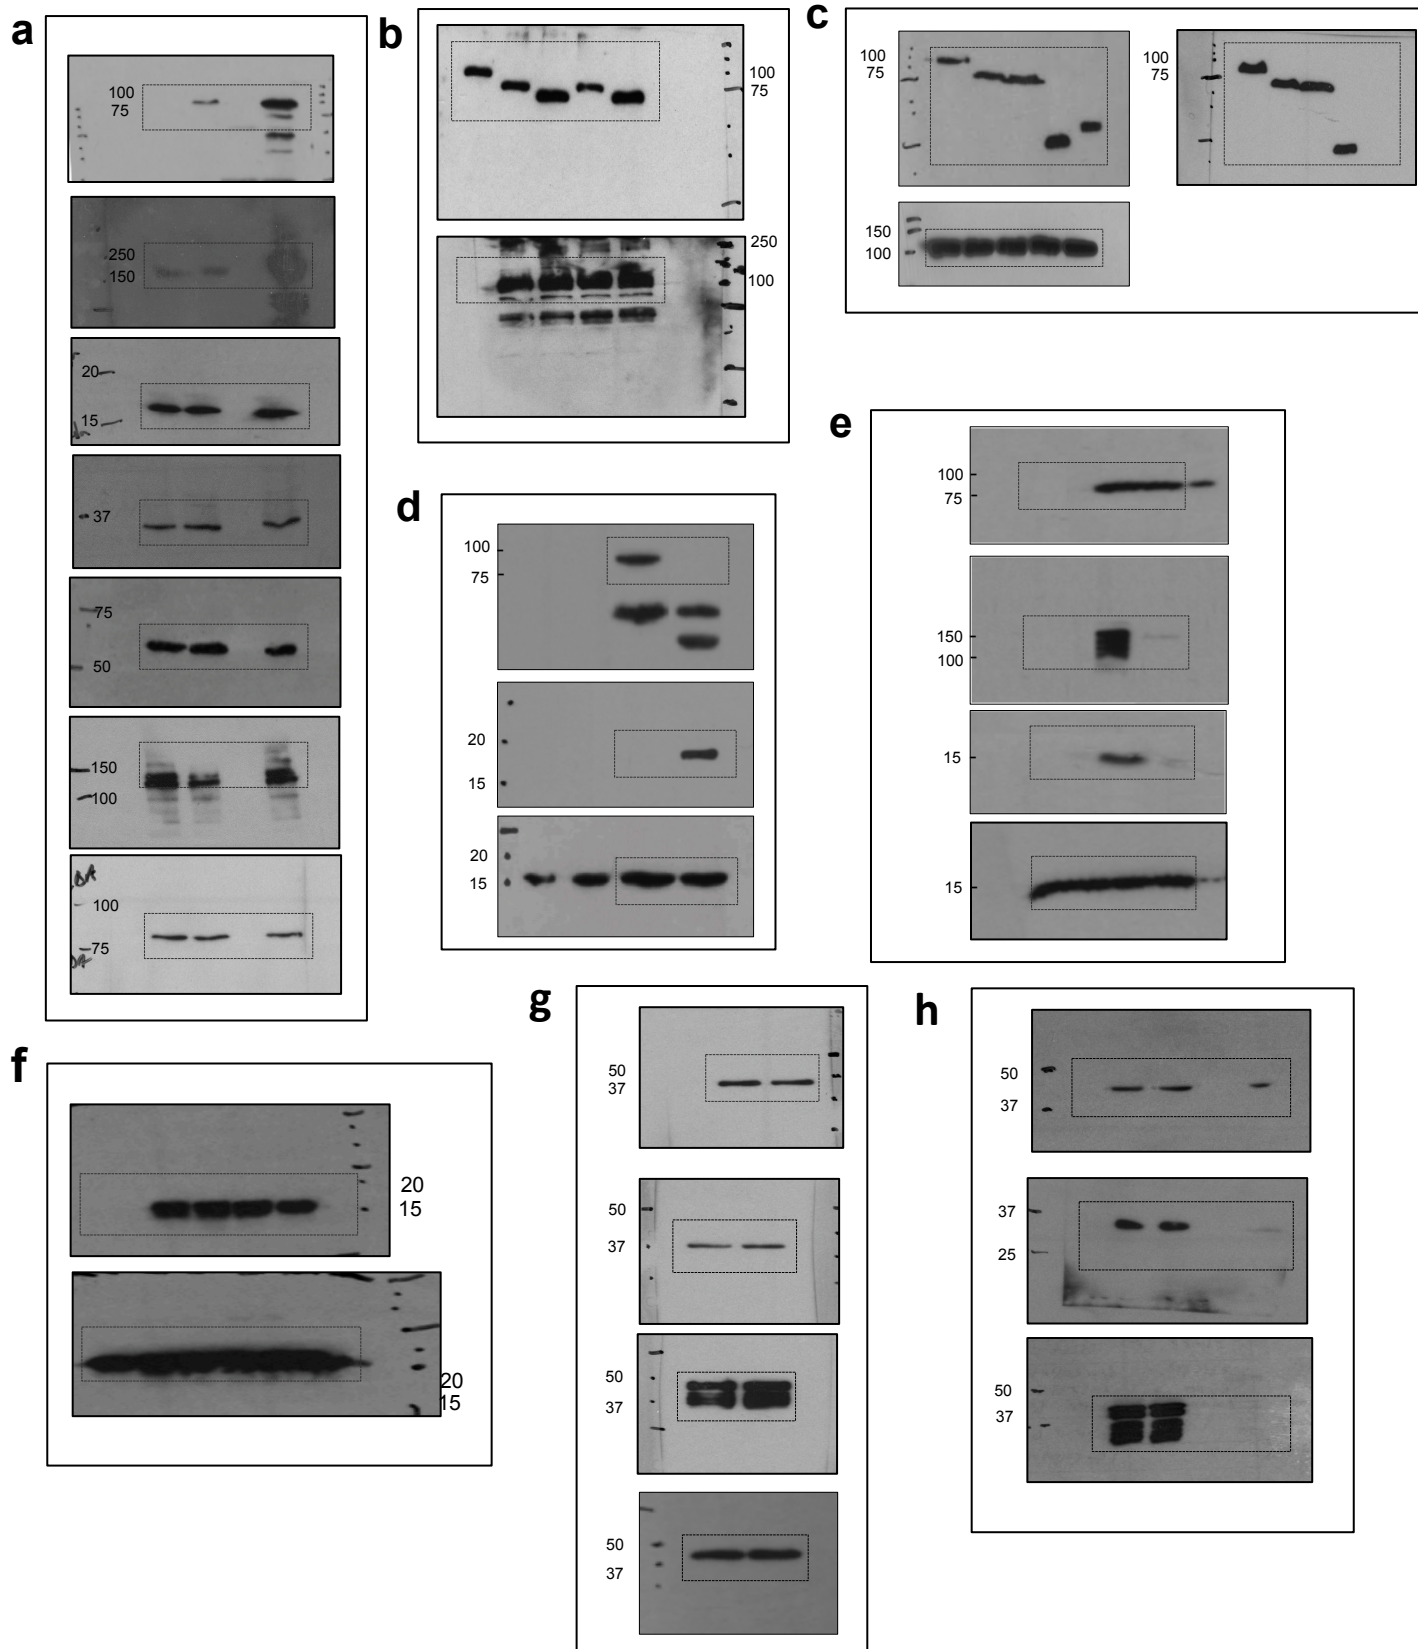

**Supplementary Figure 7. Uncropped scans of immunoblots related to main figures.**

The corresponding figure number and the molecular weight in kDa are indicated. Dot-lined boxes indicate the cropped areas presented in the figures. **(a)** for Fig. 3a, **(b)** for Fig. 3b, **(c)** for Fig. 3c, **(d)** for Fig. 3d, **(e)** for Fig. 3e, **(f)** for Fig. 3f, **(g)** for Fig. 5a, **(h)** for Fig. 5b.

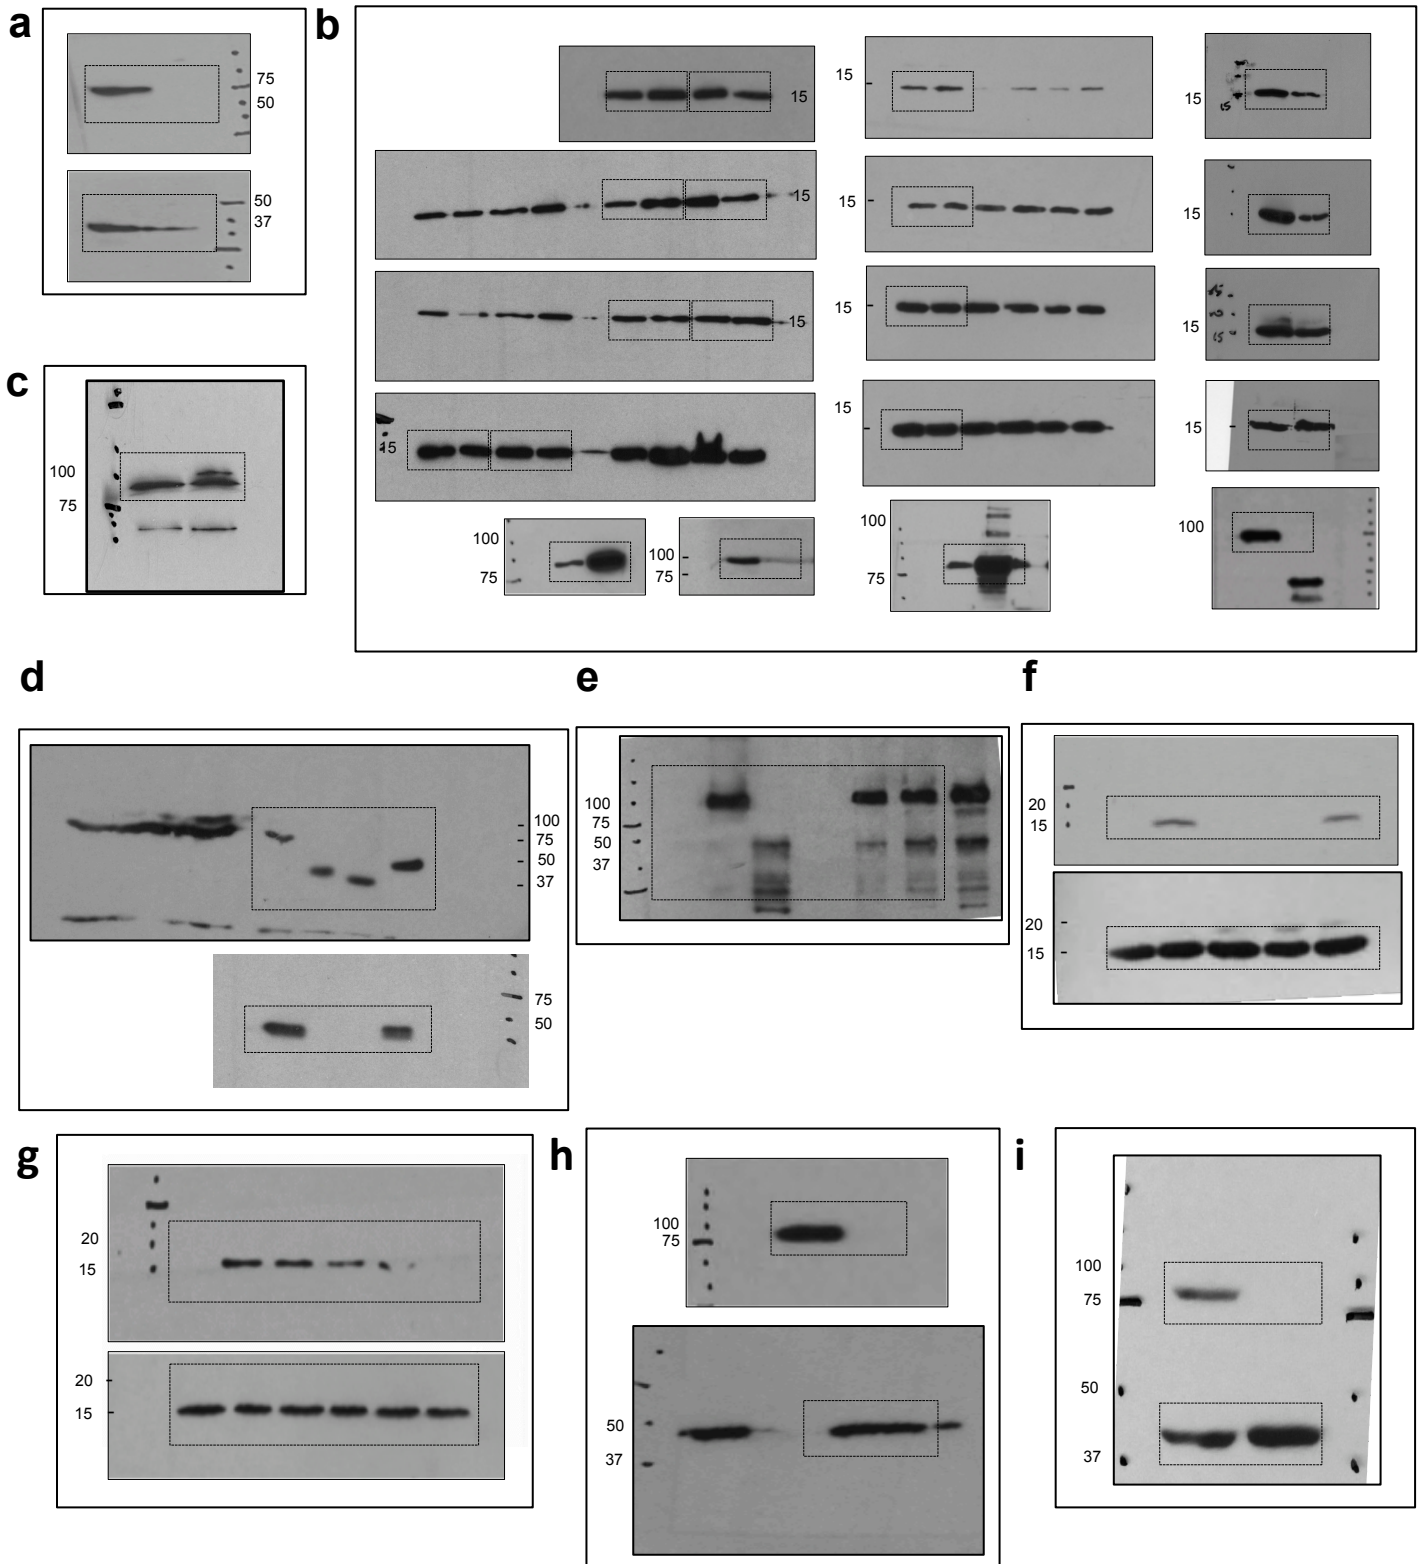

**Supplementary Figure 8. Uncropped scans of immunoblots related to suppl. figures.**

The corresponding figure number and the molecular weight in kDa are indicated. Dot-lined boxes indicate the cropped areas presented in the figures. **(a)** for Suppl. Fig. 2c, **(b)** for Suppl. Fig. 4a, **(c)** for Suppl. Fig. 4b, **(d)** for Suppl. Fig. 4c, **(e)** for Suppl. Fig. 4e, **(f)** for Suppl. Fig. 4f, **(g)** for Suppl. Fig. 4g, **(h)** for Suppl. Fig. 5c, **(i)** for Suppl. Fig. 5d.
