# Supplementary material for: Uhrf1 regulates active transcriptional marks at bivalent domains in pluripotent stem cells through Setd1a
Source: PubMed Central journal article supplement (PMC6030064; doi:10.1038/s41467-018-04818-0), 2018-07-03
Supplement: 41467_2018_4818_MOESM3_ESM.pdf [file 41467_2018_4818_MOESM3_ESM.pdf]

## **Description of Additional Supplementary Files**

**File Name: Supplementary Data 1**

**Description:** Uhrf1-interacting proteins detected by LC-MS/MS.

**File Name: Supplementary Data 2**

**Description:** Primers used for RT-qPCR and CHIP-qPCR.

**File Name: Supplementary Data 3**

**Description:** Antibodies used for this study.

**File Name: Supplementary Data 4**

**Description:** Summary of high-throughput sequencing.
